# Supplementary material for: Human Cachexia Induces Changes in Mitochondria, Autophagy and Apoptosis in the Skeletal Muscle
Source: PubMed Central journal article supplement (PMC6770124; doi:10.3390/cancers11091264), 2019-08-28

## Supplementary Materials: Human Cachexia Induces Changes in Mitochondria, Autophagy and Apoptosis in the Skeletal Muscle

Gabriela S. de Castro, Estefania Simões, Joanna D. Lima, Milene Ortiz-Silva, William T. Festuccia, Flávio Tokeshi, Paulo S. Alcantara, José P. Otoch, Dario Coletti and Marilia Seelaender

Table S1. Analyses performed in each patient of the Weight-Stable Cancer group (WSC).

|        | Haemoglobin | Serum C reactive protein | Serum albumin | Serum glucose | Serum triacylglycerol | Serum total cholesterol | Serum LDL cholesterol | Serum HDL cholesterol | Mitochondrial area | Fis1 | MFN2 | TFAM | PGC-1 $\alpha$ | Mitochondrial copy number | LC3I | LC3II | p62 | ATG7 | ATG5 | JNK | AKT | BCL2 | p53 | Caspase 8 | Caspase 9 |   |   |
|--------|-------------|--------------------------|---------------|---------------|-----------------------|-------------------------|-----------------------|-----------------------|--------------------|------|------|------|----------------|---------------------------|------|-------|-----|------|------|-----|-----|------|-----|-----------|-----------|---|---|
| 1 WSC  | x           | x                        | x             | x             | x                     | x                       | x                     | x                     |                    | x    | x    | x    | x              | x                         |      |       |     |      |      |     |     |      |     |           |           | x |   |
| 2 WSC  | x           | x                        | x             | x             | x                     | x                       | x                     | x                     |                    | x    | x    | x    | x              |                           | x    | x     | x   | x    | x    |     |     |      |     |           |           |   |   |
| 3 WSC  | x           | x                        | x             | x             | x                     | x                       | x                     | x                     |                    | x    | x    | x    | x              |                           | x    | x     | x   | x    | x    | x   | x   |      |     |           |           |   |   |
| 4 WSC  | x           | x                        | x             | x             | x                     | x                       | x                     | x                     |                    | x    | x    | x    | x              | x                         |      |       |     |      |      |     | x   | x    | x   | x         | x         | x | x |
| 5 WSC  | x           | x                        | x             | x             | x                     | x                       | x                     | x                     |                    |      |      |      |                | x                         |      |       |     |      |      |     |     |      |     |           |           |   |   |
| 6 WSC  | x           | x                        | x             | x             | x                     | x                       | x                     | x                     |                    |      |      |      |                | x                         | x    | x     | x   |      |      |     |     |      |     |           |           |   |   |
| 7 WSC  |             | x                        | x             | x             | x                     | x                       | x                     | x                     |                    | x    | x    | x    | x              |                           |      |       |     |      |      |     |     |      |     |           |           |   |   |
| 8 WSC  | x           | x                        | x             | x             | x                     | x                       | x                     | x                     |                    | x    | x    | x    | x              |                           | x    | x     | x   | x    | x    | x   | x   | x    | x   |           |           | x |   |
| 9 WSC  | x           | x                        | x             | x             | x                     | x                       | x                     | x                     |                    | x    | x    | x    | x              | x                         | x    | x     | x   |      |      |     |     |      |     |           |           |   |   |
| 10 WSC | x           | x                        | x             | x             | x                     | x                       | x                     | x                     |                    | x    | x    | x    | x              | x                         |      |       |     |      |      |     |     |      |     |           |           |   |   |
| 11 WSC | x           | x                        | x             | x             | x                     | x                       | x                     | x                     |                    | x    | x    | x    | x              | x                         |      |       |     |      |      |     |     |      |     |           |           |   |   |
| 12 WSC | x           | x                        | x             | x             | x                     | x                       | x                     | x                     |                    | x    | x    | x    | x              |                           |      |       |     |      |      |     |     |      |     |           |           |   |   |
| 13 WSC | x           | x                        | x             | x             | x                     | x                       | x                     | x                     |                    |      |      |      |                | x                         | x    | x     | x   | x    | x    |     |     |      |     |           |           |   |   |
| 14 WSC | x           | x                        | x             | x             | x                     | x                       | x                     | x                     |                    | x    | x    | x    | x              |                           |      |       |     |      |      |     |     |      |     |           |           |   |   |
| 15 WSC |             | x                        | x             | x             | x                     | x                       | x                     | x                     |                    |      |      |      |                | x                         |      |       |     |      |      |     |     |      |     |           |           |   |   |
| 16 WSC | x           |                          |               |               |                       |                         |                       |                       | x                  |      |      |      |                |                           | x    | x     | x   | x    | x    | x   | x   | x    | x   | x         | x         | x | x |
| 17 WSC | x           | x                        | x             | x             | x                     | x                       | x                     | x                     |                    | x    | x    | x    | x              | x                         |      |       |     |      |      |     |     |      |     |           |           |   |   |
| 18 WSC |             | x                        | x             | x             | x                     |                         | x                     | x                     | x                  |      |      |      |                |                           | x    | x     | x   | x    | x    | x   | x   | x    | x   |           |           |   | x |
| 19 WSC |             |                          |               |               |                       |                         |                       |                       | x                  |      |      |      |                | x                         |      |       |     |      |      |     | x   | x    | x   | x         | x         | x | x |
| 20 WSC |             |                          |               |               |                       |                         |                       |                       |                    |      |      |      |                | x                         |      |       |     |      |      |     | x   | x    | x   | x         | x         | x | x |

Table S2. Analyses performed in each patient of Cachectic Cancer Group (CC).

|       | Haemoglo<br>bin | Serum C<br>reactive | Serum<br>albumin | Serum<br>glucose | Serum<br>triacylglyc | Serum<br>total | Serum<br>LDL | Serum<br>HDL | Mitochon<br>drial area | Fis1 | MFN2 | TFAM | PGC-1 $\alpha$ | Mitochon<br>drial copy | LC3II | LC3I | p62 | ATG7 | ATG5 | JNK | AKT | BCL2 | p53 | Caspase 8 | Caspase 9 |
|-------|-----------------|---------------------|------------------|------------------|----------------------|----------------|--------------|--------------|------------------------|------|------|------|----------------|------------------------|-------|------|-----|------|------|-----|-----|------|-----|-----------|-----------|
| 1 CC  | x               | x                   | x                | x                | x                    | x              | x            | x            |                        | x    | x    | x    | x              |                        |       |      |     |      |      | x   | x   | x    | x   | x         | x         |
| 2 CC  | x               | x                   | x                | x                | x                    | x              | x            | x            |                        | x    | x    | x    | x              |                        |       |      |     |      |      | x   | x   | x    | x   | x         | x         |
| 3 CC  | x               | x                   | x                | x                | x                    | x              | x            | x            |                        | x    | x    | x    | x              |                        | x     | x    | x   | x    | x    |     |     |      |     |           |           |
| 4 CC  | x               | x                   | x                | x                | x                    | x              | x            | x            |                        | x    | x    | x    | x              | x                      |       |      |     |      |      |     |     |      |     |           |           |
| 5 CC  | x               | x                   | x                | x                | x                    | x              | x            | x            |                        | x    | x    | x    | x              | x                      | x     | x    | x   | x    | x    | x   | x   |      |     |           |           |
| 6 CC  | x               | x                   | x                | x                | x                    | x              | x            | x            |                        | x    | x    | x    | x              |                        | x     | x    | x   | x    | x    |     |     |      |     |           |           |
| 7 CC  |                 | x                   | x                | x                | x                    | x              | x            | x            |                        | x    | x    | x    | x              | x                      | x     | x    | x   | x    | x    |     |     |      |     |           |           |
| 8 CC  | x               | x                   | x                | x                | x                    | x              |              | x            |                        | x    | x    | x    | x              |                        |       |      |     |      |      |     |     |      |     |           |           |
| 9 CC  | x               | x                   | x                | x                | x                    | x              | x            | x            |                        |      |      |      |                |                        | x     | x    | x   | x    | x    | x   | x   | x    | x   | x         | x         |
| 10 CC | x               | x                   | x                | x                | x                    | x              | x            | x            |                        | x    | x    | x    | x              | x                      | x     | x    | x   |      |      |     |     |      |     |           |           |
| 11 CC | x               | x                   | x                | x                | x                    | x              | x            | x            |                        | x    | x    | x    | x              | x                      | x     | x    | x   |      |      | x   | x   | x    | x   | x         | x         |
| 12 CC | x               | x                   | x                | x                | x                    | x              | x            | x            |                        |      |      |      | x              |                        |       |      |     |      |      | x   | x   | x    | x   | x         | x         |
| 13 CC | x               | x                   | x                | x                | x                    | x              | x            | x            |                        |      |      |      |                |                        | x     | x    | x   |      |      |     |     |      |     |           |           |
| 14 CC | x               | x                   | x                | x                | x                    | x              | x            | x            |                        |      |      |      | x              |                        | x     | x    | x   |      |      | x   | x   | x    | x   | x         | x         |
| 15 CC | x               | x                   | x                | x                | x                    | x              | x            | x            |                        | x    | x    | x    | x              |                        |       |      |     |      |      |     |     |      |     |           |           |
| 16 CC | x               | x                   | x                | x                | x                    | x              | x            | x            |                        | x    | x    | x    | x              |                        |       |      |     |      |      |     |     |      |     |           |           |
| 17 CC | x               | x                   | x                | x                | x                    | x              | x            | x            |                        | x    | x    | x    | x              |                        |       |      |     |      |      |     |     |      |     |           |           |
| 18 CC | x               | x                   | x                | x                | x                    | x              | x            | x            |                        |      |      |      | x              |                        |       |      |     |      |      | x   | x   | x    | x   | x         | x         |
| 19 CC | x               | x                   | x                | x                | x                    | x              | x            | x            |                        | x    | x    | x    | x              |                        |       |      |     |      |      |     |     |      |     |           |           |
| 20 CC | x               | x                   | x                | x                | x                    | x              | x            | x            | x                      | x    | x    | x    | x              | x                      |       |      |     |      |      | x   | x   | x    | x   | x         | x         |
| 21 CC | x               | x                   | x                | x                | x                    | x              | x            | x            | x                      | x    | x    | x    | x              | x                      |       |      |     |      |      |     |     |      |     |           |           |
| 22 CC | x               | x                   | x                | x                | x                    | x              | x            | x            |                        |      |      |      | x              | x                      | x     | x    | x   | x    | x    | x   | x   | x    | x   | x         | x         |
| 23 CC | x               |                     |                  |                  |                      |                |              |              | x                      |      |      |      | x              |                        |       |      |     |      |      | x   | x   | x    | x   | x         | x         |
| 24 CC | x               |                     | x                |                  |                      |                |              |              | x                      |      |      |      | x              |                        |       |      |     |      |      | x   | x   | x    | x   | x         | x         |

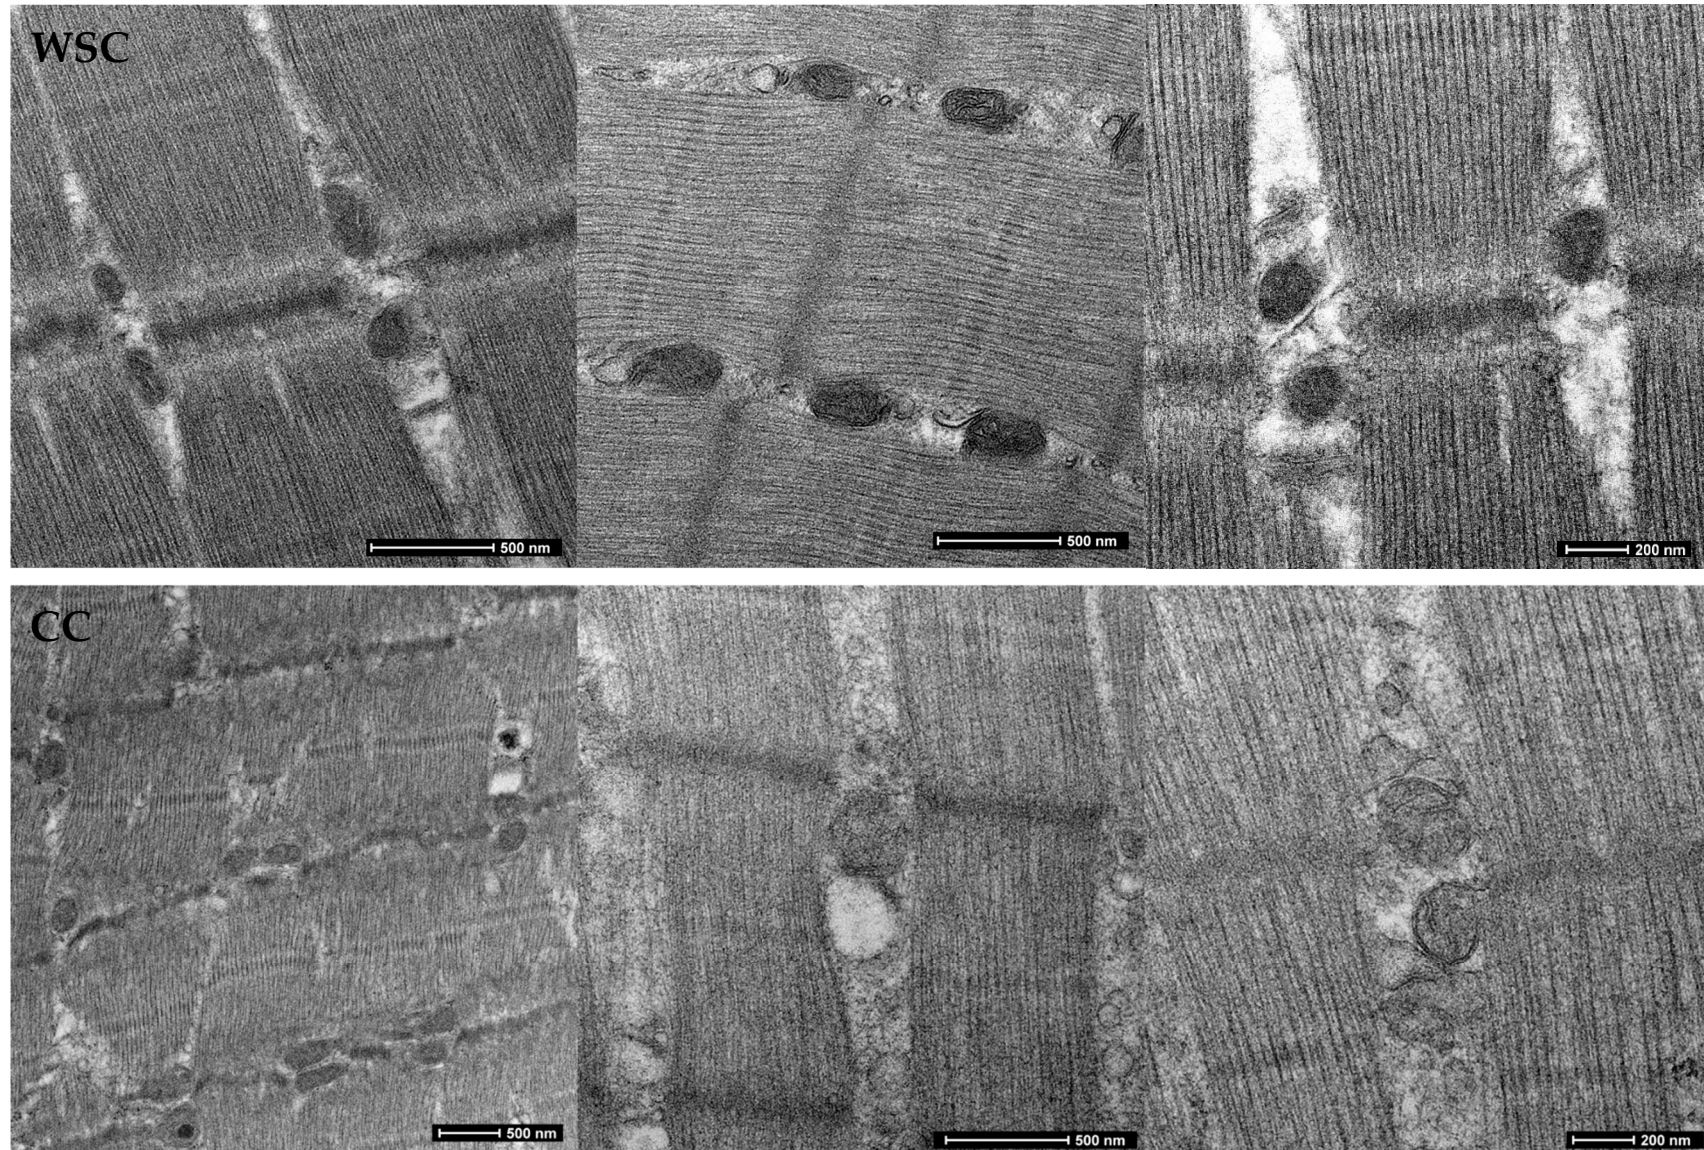

**Figure S1.** Skeletal muscle photomicrograph showing intermyofibrillar mitochondria of WSC ( $n = 3$ ) and CC ( $n = 3$ ). WSC – weight-stable cancer patients; CC – cachectic cancer.

WSC

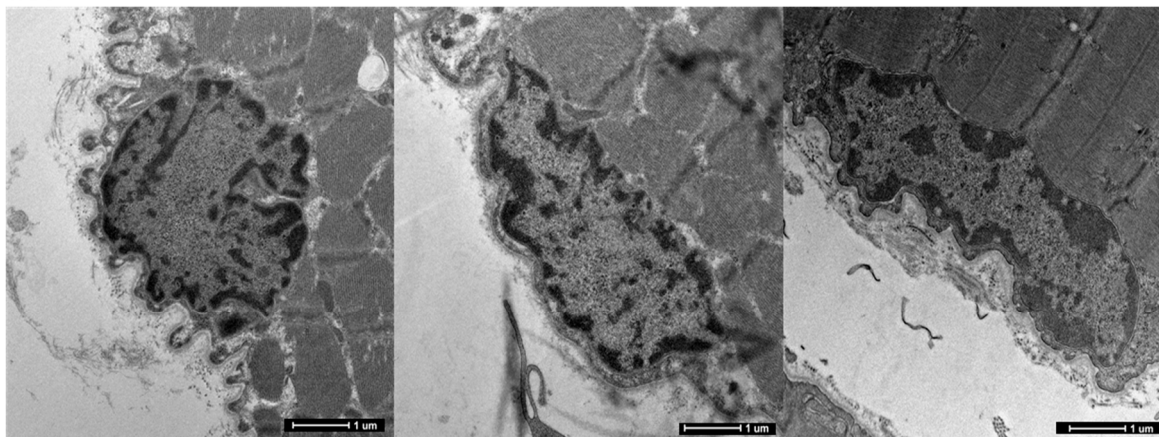

CC

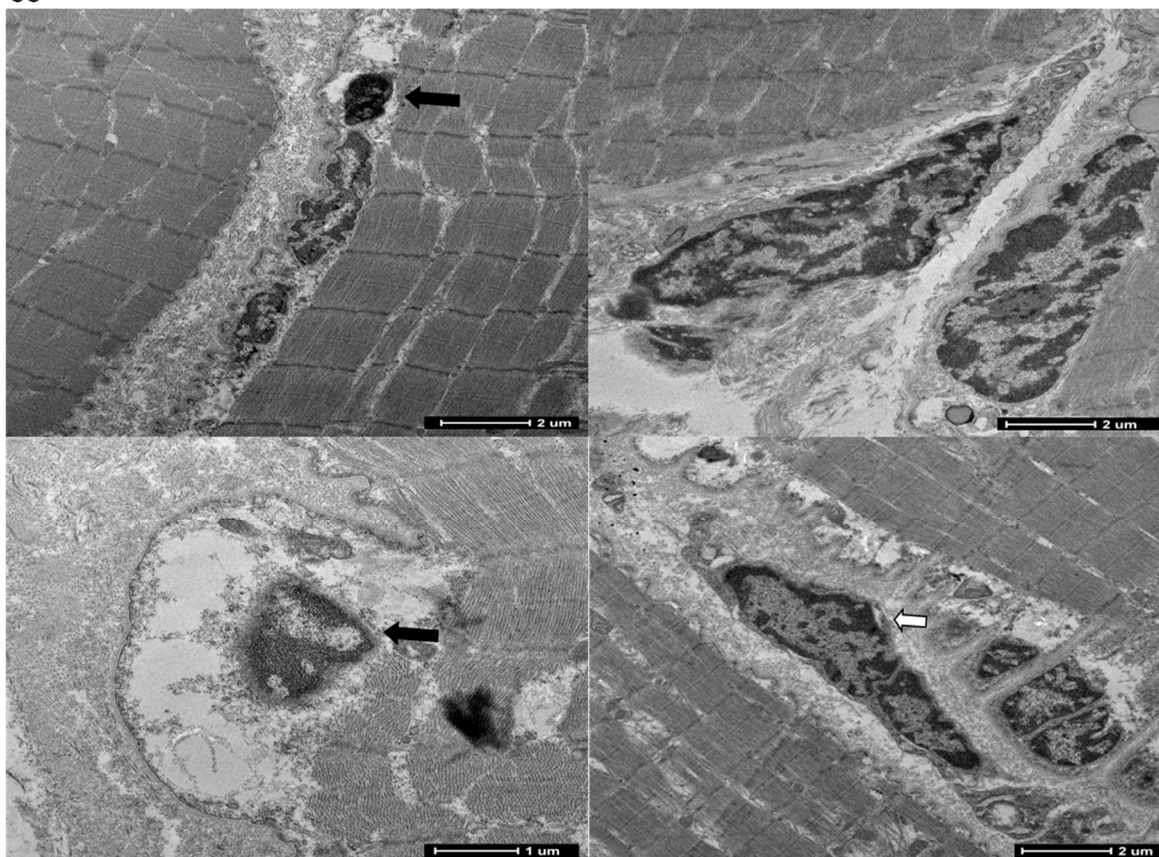

**Figure S2.** Skeletal muscle nuclei photomicrograph of WSC ( $n = 3$ ) and CC ( $n = 4$ ). Black arrows indicate apoptotic body; white arrow indicate chromatin condensation in CC patients. WSC – weight-stable cancer patients; CC – cachectic cancer patients.

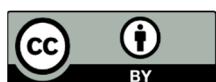

Supplement: cancers-11-01264-s001.pdf [file cancers-11-01264-s001.pdf]
